# Supplementary material for: APOBEC3 mutational signatures are associated with extensive and diverse genomic instability across multiple tumour types
Source: PubMed Central journal article supplement (PMC9124393; doi:10.1186/s12915-022-01316-0), 2022-05-21
Supplement: 12915_2022_1316_MOESM1_ESM.pdf [file 12915_2022_1316_MOESM1_ESM.pdf]

# Supplementary Material

## Supplementary Tables

Supplementary Table 1: The number of samples belonging to each tumour type that either contain SBS2 and SBS13 mutations, or do not contain SBS2 and SBS13 mutations.

|    | Tumour type | Number of samples with SBS2 and SBS13 mutations | Number of samples without SBS2 and SBS13 mutations | Total number of samples |
|----|-------------|-------------------------------------------------|----------------------------------------------------|-------------------------|
| 1  | BLCA        | 23                                              | 0                                                  | 23                      |
| 2  | BOCA        | 22                                              | 39                                                 | 61                      |
| 3  | BRCA        | 185                                             | 24                                                 | 209                     |
| 4  | BTCA        | 9                                               | 3                                                  | 12                      |
| 5  | CESC        | 18                                              | 2                                                  | 20                      |
| 6  | CLLE        | 0                                               | 90                                                 | 90                      |
| 7  | CMDI        | 0                                               | 30                                                 | 30                      |
| 8  | COAD        | 0                                               | 37                                                 | 37                      |
| 9  | DLBC        | 2                                               | 5                                                  | 7                       |
| 10 | EOPC        | 0                                               | 41                                                 | 41                      |
| 11 | ESAD        | 32                                              | 65                                                 | 97                      |
| 12 | GACA        | 14                                              | 18                                                 | 32                      |
| 13 | GBM         | 0                                               | 30                                                 | 30                      |
| 14 | HNSC        | 43                                              | 0                                                  | 43                      |
| 15 | KICH        | 9                                               | 34                                                 | 43                      |
| 16 | KIRC        | 2                                               | 35                                                 | 37                      |
| 17 | KIRP        | 3                                               | 29                                                 | 32                      |
| 18 | LAML        | 0                                               | 8                                                  | 8                       |
| 19 | LGG         | 0                                               | 18                                                 | 18                      |
| 20 | LICA        | 0                                               | 5                                                  | 5                       |
| 21 | LIHC        | 0                                               | 53                                                 | 53                      |
| 22 | LINC        | 0                                               | 28                                                 | 28                      |
| 23 | LIRI        | 5                                               | 245                                                | 250                     |
| 24 | LUAD        | 22                                              | 15                                                 | 37                      |
| 25 | LUSC        | 39                                              | 8                                                  | 47                      |
| 26 | MALY        | 7                                               | 93                                                 | 100                     |
| 27 | ORCA        | 10                                              | 3                                                  | 13                      |
| 28 | OV          | 49                                              | 52                                                 | 101                     |
| 29 | PACA        | 145                                             | 85                                                 | 230                     |
| 30 | PAEN        | 27                                              | 54                                                 | 81                      |
| 31 | PBCA        | 0                                               | 230                                                | 230                     |
| 32 | PRAD        | 2                                               | 151                                                | 153                     |
| 33 | READ        | 0                                               | 15                                                 | 15                      |
| 34 | RECA        | 1                                               | 73                                                 | 74                      |
| 35 | SARC        | 24                                              | 10                                                 | 34                      |
| 36 | SKCM        | 0                                               | 2                                                  | 2                       |
| 37 | STAD        | 18                                              | 18                                                 | 36                      |
| 38 | THCA        | 10                                              | 38                                                 | 48                      |
| 39 | UCEC        | 20                                              | 24                                                 | 44                      |

Supplementary Table 2: Spearman correlation coefficients for the correlation between log number of APOBEC mutations and the log number of non-APOBEC mutations by tumour type. p-values were corrected for multiple testing using the Benjamini-Hochberg procedure for controlling false discovery rate (FDR) at  $\alpha = 0.05$ .

| Project Code | Project Name                          | n   | $\rho$ | p-value                | Significance    | Adjusted p-value       |
|--------------|---------------------------------------|-----|--------|------------------------|-----------------|------------------------|
| BLCA         | Bladder Urothelial Carcinoma          | 23  | 0.161  | 0.462                  | Not significant | 0.535                  |
| BOCA         | Bone Cancer                           | 22  | 0.917  | $1.9 \times 10^{-9}$   | Significant     | $1.05 \times 10^{-8}$  |
| BRCA         | Breast Cancer                         | 185 | 0.247  | $6.87 \times 10^{-4}$  | Significant     | 0.00151                |
| BTCA         | Biliary Tract Cancer                  | 9   | 0.225  | 0.56                   | Not significant | 0.616                  |
| CESC         | Cervical Squamous Cell Carcinoma      | 18  | 0.132  | 0.602                  | Not significant | 0.63                   |
| DLBC         | Diffuse Large B-Cell Lymphoma         | 2   |        |                        |                 |                        |
| ESAD         | Esophageal Adenocarcinoma             | 32  | 0.881  | $2.8 \times 10^{-11}$  | Significant     | $3.08 \times 10^{-10}$ |
| GACA         | Gastric Cancer                        | 14  | 0.986  | $9.97 \times 10^{-11}$ | Significant     | $7.31 \times 10^{-10}$ |
| HNSC         | Head and Neck Squamous Cell Carcinoma | 43  | 0.535  | $2.21 \times 10^{-4}$  | Significant     | $6.09 \times 10^{-4}$  |
| KICH         | Kidney Chromophobe                    | 9   | 0.921  | $4.23 \times 10^{-4}$  | Significant     | 0.00103                |
| KIRC         | Kidney Renal Clear Cell Carcinoma     | 2   |        |                        |                 |                        |
| KIRP         | Kidney Renal Papillary Cell Carcinoma | 3   | -0.247 | 0.841                  | Not significant | 0.841                  |
| LIRI         | Liver Cancer                          | 5   | 0.883  | 0.0472                 | Not significant | 0.0649                 |
| LUAD         | Lung Adenocarcinoma                   | 22  | 0.801  | $7.58 \times 10^{-6}$  | Significant     | $2.78 \times 10^{-5}$  |
| LUSC         | Lung Squamous Cell Carcinoma          | 39  | 0.328  | 0.0413                 | Not significant | 0.0606                 |
| MALY         | Malignant Lymphoma                    | 7   | 0.8    | 0.0308                 | Significant     | 0.0483                 |
| ORCA         | Oral Cancer                           | 10  | 0.84   | 0.00234                | Significant     | 0.00468                |
| OV           | Ovarian Cancer                        | 49  | 0.603  | $4.62 \times 10^{-6}$  | Significant     | $2.03 \times 10^{-5}$  |
| PACA         | Pancreatic Cancer                     | 145 | 0.676  | $1.08 \times 10^{-20}$ | Significant     | $2.38 \times 10^{-19}$ |
| PAEN         | Pancreatic Cancer Endocrine Neoplasms | 27  | 0.514  | 0.00615                | Significant     | 0.0113                 |
| PRAD         | Prostate Cancer of Adenocarcinoma     | 2   |        |                        |                 |                        |
| RECA         | Renal Clear Cell Carcinoma            | 1   |        |                        |                 |                        |
| SARC         | Sarcoma                               | 24  | 0.528  | 0.00794                | Significant     | 0.0134                 |
| STAD         | Gastric Adenocarcinoma                | 18  | 0.834  | $1.66 \times 10^{-5}$  | Significant     | $5.22 \times 10^{-5}$  |
| THCA         | Thyroid Cancer                        | 10  | 0.354  | 0.316                  | Not significant | 0.386                  |
| UCEC         | Uterine Corpus Endometrial Carcinoma  | 20  | 0.299  | 0.201                  | Not significant | 0.26                   |

Supplementary Table 3: Mixed Effects Models for Predicting the Number of non-APOBEC3 mutations. Models 1, 2, and 3 correspond to models 1, 2, and 3 described in Supplementary Note 1. Model 1 only considers the effects of age on the total mutation burden excluding APOBEC3 mutations. Model 2 considers only the effects of APOBEC3 mutations, and model 3 considers both the effects of age and the number of APOBEC3 mutations on the non-APOBEC3 mutation burden.

| <i>Dependent variable:</i>           |                                                                              |                                                                               |                                                                               |
|--------------------------------------|------------------------------------------------------------------------------|-------------------------------------------------------------------------------|-------------------------------------------------------------------------------|
| log(Number of non-APOBEC3 mutations) |                                                                              |                                                                               |                                                                               |
|                                      | (1)                                                                          | (2)                                                                           | (3)                                                                           |
| Age                                  | Coefficient: 0.010<br>$p = 3.76 \times 10^{-6}$ ***<br>95% CI (0.006, 0.014) |                                                                               | Coefficient: 0.007<br>$p = 2.26 \times 10^{-3}$ **<br>95% CI (0.003, 0.010)   |
| log(Number of APOBEC3 mutations)     |                                                                              | Coefficient: 0.342<br>$p = 4.16 \times 10^{-56}$ ***<br>95% CI (0.303, 0.381) | Coefficient: 0.349<br>$p = 2.27 \times 10^{-49}$ ***<br>95% CI (0.310, 0.388) |
| Constant                             | Coefficient: 8.12<br>$p = 3.52 \times 10^{-51}$ ***<br>95% CI (7.746, 8.499) | Coefficient: 6.415<br>$p = 1.08 \times 10^{-60}$ ***<br>95% CI (6.061, 6.770) | Coefficient: 5.996<br>$p = 2.45 \times 10^{-63}$ ***<br>95% CI (5.608, 6.384) |
| Observations                         | 725                                                                          | 741                                                                           | 725                                                                           |
| Log Likelihood                       | -831.379                                                                     | -741.003                                                                      | -703.723                                                                      |
| Akaike Inf. Crit.                    | 1670.759                                                                     | 1490.005                                                                      | 1417.445                                                                      |
| Bayesian Inf. Crit.                  | 1689.104                                                                     | 1508.437                                                                      | 1440.376                                                                      |

*Note:*

\* $p < 0.05$ ; \*\* $p < 0.01$ ; \*\*\* $p < 0.001$

Supplementary Table 4: Wilcoxon rank sum test, comparing the levels of each of the genomic instability measures between samples containing SBS2 and SBS13 mutations, and those not containing SBS2 and SBS13 mutations. Results are represented visually in Figure 2.  $n = 2,451$  for INDELS, ID8, ID6, PGA and Copy Number Segments.  $n = 2,427$  for SVs.

| Measure              | $p$ -value              | Significance | Adjusted $p$ -value    |
|----------------------|-------------------------|--------------|------------------------|
| SVs                  | $8.71 \times 10^{-100}$ | Significant  | $5.22 \times 10^{-99}$ |
| Copy Number Segments | $3.56 \times 10^{-90}$  | Significant  | $1.07 \times 10^{-89}$ |
| PGA                  | $1.15 \times 10^{-86}$  | Significant  | $2.30 \times 10^{-86}$ |
| INDELS               | $7.71 \times 10^{-15}$  | Significant  | $7.71 \times 10^{-15}$ |
| ID8                  | $4.01 \times 10^{-20}$  | Significant  | $4.81 \times 10^{-20}$ |
| ID6                  | $7.74 \times 10^{-34}$  | Significant  | $1.16 \times 10^{-33}$ |

Supplementary Table 5: Combined  $p$ -values using Fisher's combined probability test.  $p$ -values were combined for the different measures of genomic instability within each tumour type, and the resulting Fisher method  $p$ -values were corrected for multiple testing using the Benjamini-Hochberg procedure for controlling false discovery rate (FDR) at  $\alpha = 0.05$ .

| Tumour Type | Number of GI measures | Fisher method $p$ -value | Significance    | Adjusted $p$ -value    |
|-------------|-----------------------|--------------------------|-----------------|------------------------|
| BOCA        | 6                     | $3.14 \times 10^{-5}$    | Significant     | $9.42 \times 10^{-5}$  |
| BRCA        | 6                     | $7.77 \times 10^{-8}$    | Significant     | $3.73 \times 10^{-7}$  |
| BTCA        | 5                     | $9.13 \times 10^{-3}$    | Significant     | 0.0183                 |
| CESC        | 5                     | 0.0151                   | Significant     | 0.0241                 |
| DLBC        | 6                     | 0.975                    | Not significant | 0.975                  |
| ESAD        | 6                     | 0.298                    | Not significant | 0.358                  |
| GACA        | 6                     | 0.202                    | Not significant | 0.262                  |
| KICH        | 6                     | 0.0101                   | Significant     | 0.0186                 |
| KIRC        | 6                     | $1.92 \times 10^{-4}$    | Significant     | $4.19 \times 10^{-4}$  |
| KIRP        | 6                     | $3.17 \times 10^{-7}$    | Significant     | $1.27 \times 10^{-6}$  |
| LIRI        | 6                     | 0.0638                   | Not significant | 0.0958                 |
| LUAD        | 6                     | $2.95 \times 10^{-5}$    | Significant     | $9.423 \times 10^{-5}$ |
| LUSC        | 6                     | 0.944                    | Not significant | 0.975                  |
| MALY        | 6                     | $5.76 \times 10^{-10}$   | Significant     | $4.61 \times 10^{-9}$  |
| ORCA        | 6                     | 0.922                    | Not significant | 0.975                  |
| OV          | 6                     | 0.206                    | Not significant | 0.262                  |
| PACA        | 6                     | $3.47 \times 10^{-13}$   | Significant     | $8.34 \times 10^{-12}$ |
| PAEN        | 6                     | $9.75 \times 10^{-11}$   | Significant     | $1.17 \times 10^{-9}$  |
| PRAD        | 6                     | $7.29 \times 10^{-5}$    | Significant     | $1.94 \times 10^{-4}$  |
| RECA        | 6                     | 0.207                    | Not significant | 0.262                  |
| SARC        | 5                     | $1.03 \times 10^{-4}$    | Significant     | 0.000247               |
| STAD        | 6                     | 0.0130                   | Significant     | 0.0223                 |
| THCA        | 5                     | 0.545                    | Not significant | 0.623                  |
| UCEC        | 6                     | $3.67 \times 10^{-9}$    | Significant     | $2.20 \times 10^{-8}$  |

Supplementary Table 6: Akaike Information Criteria (AIC) and  $p$ -values from ANOVAs comparing models with and without TP53 status for each GI measures. Full models are specified in Supplementary Note 1.

| GI Measure           | $p$ -value            | AIC without TP53 | AIC with TP53 |
|----------------------|-----------------------|------------------|---------------|
| PGA                  | $4.02 \times 10^{-8}$ | 6738             | 6710          |
| Copy Number Segments | $5.32 \times 10^{-3}$ | 10064            | 10058         |
| Structural Variants  | $1.75 \times 10^{-4}$ | 8701             | 8687          |
| INDELS               | 1.00                  | 10444            | 10448         |
| ID8                  | 0.101                 | 6357             | 6356          |
| ID6                  | 0.0133                | 3270             | 3266          |

Supplementary Table 7: Coxme model using only SBS2 and SBS13 presence to predict survival (n = 1,492)

| <b>Random Effects</b> |             |                    |             |          |          |
|-----------------------|-------------|--------------------|-------------|----------|----------|
|                       | N           | Standard Deviation | Variance    |          |          |
| Tumour Type           | 36          | 1.14               | 1.31        |          |          |
| <b>Fixed Effects</b>  |             |                    |             |          |          |
|                       | Coefficient | Hazard Ratio       | 95% CI      | <i>z</i> | <i>p</i> |
| SBS2/13 presence      | 0.162       | 1.18               | (0.95,1.45) | 1.52     | 0.127    |

Supplementary Table 8: Coxme model using SBS2 and SBS13 presence, p53 mutation status, and the interaction between them as predictors of survival. (n = 1,492)

| <b>Random Effects</b>          |             |                    |               |          |           |
|--------------------------------|-------------|--------------------|---------------|----------|-----------|
|                                | N           | Standard Deviation | Variance      |          |           |
| Tumour Type                    | 36          | 1.14               | 1.31          |          |           |
| <b>Fixed Effects</b>           |             |                    |               |          |           |
|                                | Coefficient | Hazard Ratio       | 95% CI        | <i>z</i> | <i>p</i>  |
| SBS2/13 Presence               | 0.366       | 1.44               | (1.08,1.92)   | 2.49     | 0.0128*   |
| TP53 Mutation                  | 0.384       | 1.47               | (1.14,1.90)   | 2.95     | 0.00318** |
| SBS2/13 Presence*TP53 Mutation | -0.362      | 0.697              | (0.487,0.996) | -1.98    | 0.0477*   |



Supplementary Table 9: Mixed effects models predicting the levels of six different measures of instability using age, the number of SBS2 and SBS13 mutations excluding those attributed to kataegis, accounting for the effects of tumour type as a random variable. The number of remaining SBS2 and SBS13 mutations was log transformed using the natural logarithm. These models correspond to models 3-9, detailed in Supplementary Note 1. (SV = Structural Variant, CNV = Copy Number, PGA = Proportion of the Genome Altered, INDELS = Insertions and Deletions, ID8 = INDEL signature 8, ID6 = INDEL signature 6, LMM = Linear Mixed Effects Model, NB = Negative Binomial, ZINB = Zero Inflated Negative Binomial, AIC = Akaike Information Criterion, BIC = Bayesian Information Criterion)

|                          |                   | <i>Dependent variable:</i> |                         |                       |                        |                        |                        |        |  |      |  |      |  |
|--------------------------|-------------------|----------------------------|-------------------------|-----------------------|------------------------|------------------------|------------------------|--------|--|------|--|------|--|
|                          |                   | PGA                        |                         | CN Segments           |                        | SVs                    |                        | INDELS |  | ID8  |  | ID6  |  |
| Model Type               |                   | LMM                        |                         | NB                    |                        | NB                     |                        | NB     |  | ZINB |  | ZINB |  |
| Count model: (Intercept) | Coefficient       | 7.67                       | 4.72                    | 1.33                  | 1.65                   | 0.233                  | 5.19                   |        |  |      |  |      |  |
|                          | 95% CI            | (-5.05, 20.4)              | (4.31, 5.13)            | (-0.220, 2.88)        | (0.613, 2.68)          | (-1.54, 2.01)          | (1.18, 9.21)           |        |  |      |  |      |  |
| Count model: Age         | p-value           | 0.238                      | $3.38 \times 10^{-114}$ | 0.0926                | $1.79 \times 10^{-03}$ | 0.796                  | 0.0112*                |        |  |      |  |      |  |
|                          | Coefficient       | 0.0687                     | $-2.37 \times 10^{-7}$  | 0.0265                | 0.0381                 | 0.0319                 | -0.0522                |        |  |      |  |      |  |
| Count model:             | 95% CI            | (-0.0684, 0.206)           | (-0.00341, 0.00341)     | (0.00257, 0.0503)     | (0.0219, 0.0542)       | (0.00426, 0.0596)      | (-0.114, 0.00976)      |        |  |      |  |      |  |
|                          | p-value           | 0.326                      | 1.00                    | 0.0299*               | $3.95 \times 10^{-6}$  | 0.024*                 | 0.0987                 |        |  |      |  |      |  |
| log(SBS2/13 - kataegis)  | Coefficient       | 5.97                       | 0.204                   | 0.554                 | 0.696                  | 0.645                  | 0.056                  |        |  |      |  |      |  |
|                          | 95% CI            | (4.52, 7.42)               | (0.165, 0.244)          | (0.324, 0.783)        | (0.540, 0.852)         | (0.370, 0.920)         | (-0.523, 0.636)        |        |  |      |  |      |  |
| Count model: Age:        | p-value           | $3.67 \times 10^{-15}$     | $2.35 \times 10^{-24}$  | $2.21 \times 10^{-6}$ | $2.83 \times 10^{-9}$  | $4.19 \times 10^{-6}$  | 0.849                  |        |  |      |  |      |  |
|                          | Coefficient       |                            |                         | -0.00428              | -0.00545               | -0.00488               | 0.00686                |        |  |      |  |      |  |
| log(SBS2/13 - kataegis)  | 95% CI            |                            |                         | (-0.00791, -0.000651) | (-0.00790, -0.00299)   | (-0.00914, -0.000621)  | (-0.0021, 0.0158)      |        |  |      |  |      |  |
|                          | p-value           |                            |                         | 0.0208*               | $1.41 \times 10^{-5}$  | 0.0247*                | 0.134                  |        |  |      |  |      |  |
| Zero model: (Intercept)  | Coefficient       |                            |                         |                       |                        | -0.682                 | 1.07                   |        |  |      |  |      |  |
|                          | 95% CI            |                            |                         |                       |                        | (-0.837, -0.528)       | (0.901, 1.23)          |        |  |      |  |      |  |
| AIC                      | p-value           |                            |                         |                       |                        | $5.40 \times 10^{-18}$ | $5.42 \times 10^{-36}$ |        |  |      |  |      |  |
|                          |                   | 6735.3                     | 10081.1                 | 8722.8                | 10430.9                | 6339.6                 | 3267.7                 |        |  |      |  |      |  |
| BIC                      |                   | 6758.2                     | 10104.0                 | 8750.2                | 10458.4                | 6371.7                 | 3299.8                 |        |  |      |  |      |  |
|                          | Log Likelihood    | -3362.6                    | -5035.6                 | -4355.4               | -5209.5                | -3162.8                | -1626.9                |        |  |      |  |      |  |
| Num. obs.                |                   | 724                        | 724                     | 716                   | 724                    | 724                    | 724                    |        |  |      |  |      |  |
|                          | Num. Tumour Types | 26                         | 26                      | 26                    | 26                     | 26                     | 26                     |        |  |      |  |      |  |

\*\*\*  $p < 0.001$ ; \*\*  $p < 0.01$ ; \*  $p < 0.05$

Supplementary Table 10: Mixed Effects Models Predicting the levels of six different measures of instability using the log number of SBS2 and SBS13 mutations excluding those attributed to kataegis, and TP53 mutation status, as well as accounting for the effects of tumour type as a random variable. The number of remaining SBS2 and SBS13 mutations was log transformed using the natural logarithm. These models correspond to models 10-15, detailed in Supplementary Note 1. (SV = Structural Variant, CNV = Copy Number Variation, PGA = Proportion of the Genome Altered, INDELS = Insertions and Deletions, ID8 = INDEL signature 8, ID6 = INDEL signature 6, LMM = Linear Mixed Effects Model, NB = Negative Binomial, ZINB = Zero Inflated Negative Binomial, AIC = Akaike Information Criterion, BIC = Bayesian Information Criterion)

|                                              |                           | <i>Dependent variable:</i> |                                   |                             |                                   |                             |      |
|----------------------------------------------|---------------------------|----------------------------|-----------------------------------|-----------------------------|-----------------------------------|-----------------------------|------|
|                                              |                           | PGA                        | CN Segments                       | SVs                         | INDELS                            | ID8                         | ID6  |
| Model Type                                   | LMM                       | NB                         | NB                                | NB                          | NB                                | ZINB                        | ZINB |
| (Intercept)                                  | 8.97<br>(-3.32, 21.3)     | 4.73<br>(4.32, 5.13)       | 1.23<br>(-0.292, 2.75)            | 3.42<br>(2.96, 3.89)        | 0.313<br>(-1.46, 2.09)            | 1.60<br>(0.362, 2.83)       |      |
|                                              | 0.154                     | 2.29x10 <sup>-115***</sup> | 0.113                             | 3.16x10 <sup>-47***</sup>   | 0.729                             | 0.0113*                     |      |
| Count model: Age                             | 0.0536                    | -0.000350                  | 0.0214                            | 0.00310                     | 0.0301                            | -0.00366                    |      |
|                                              | (-0.0803, 0.188)          | (-0.00375, 0.00305)        | (-0.00234, 0.0452)                | (-0.000557, 0.00676)        | (0.00234, 0.0578)                 | (-0.0131, 0.00574)          |      |
|                                              | 0.433                     | 0.840                      | 0.0772                            | 0.0966                      | 0.0335*                           | 0.445                       |      |
| Count model:<br>log(SBS2/13 - kataegis)      | 5.35<br>(3.93, 6.78)      | 0.199<br>(0.160, 0.239)    | 0.568<br>(0.343, 0.793)           | 0.419<br>(0.365, 0.473)     | 0.628<br>(0.353, 0.903)           | 0.584<br>(0.430, 0.737)     |      |
|                                              | 6.78x10 <sup>-13***</sup> | 1.73x10 <sup>-25***</sup>  | 7.64x10 <sup>-7***</sup>          | 8.25x10 <sup>-52***</sup>   | 7.49x10 <sup>-6***</sup>          | 9.32x10 <sup>-14***</sup>   |      |
| Count model: TP53                            | 11.2<br>(7.34, 15.1)      | 0.148<br>(0.0540, 0.242)   | 1.13<br>(0.449, 1.82)             | 0.957<br>(0.440, 1.47)      | 0.130<br>(-0.0172, 0.277)         | 2.20<br>(0.353, 4.05)       |      |
|                                              | 2.27x10 <sup>-8***</sup>  | 2.02x10 <sup>-3**</sup>    | 1.17x10 <sup>-3**</sup>           | 2.85x10 <sup>-4***</sup>    | 0.0835                            | 0.0196*                     |      |
| Count model: log(SBS2/13<br>- kataegis):TP53 |                           |                            | -0.136<br>(-0.238, -0.0344)       | -0.141<br>(-0.218, -0.0650) |                                   | -0.356<br>(-0.624, -0.0870) |      |
|                                              |                           |                            | 8.73x10 <sup>-3**</sup>           | 2.89x10 <sup>-4***</sup>    |                                   | 9.48x10 <sup>-3**</sup>     |      |
| Count model: Age:<br>log(SBS2/13 - kataegis) |                           |                            | -0.00365<br>(-0.00726, -0.000348) |                             | -0.00464<br>(-0.00890, -0.000380) |                             |      |
|                                              |                           |                            | 0.0478*                           |                             | 0.0328*                           |                             |      |
| Zero model: (Intercept)                      |                           |                            |                                   |                             | -0.682<br>(-0.837, -0.528)        | 1.07<br>(0.900, 1.23)       |      |
|                                              |                           |                            |                                   |                             | 5.39x10 <sup>-18***</sup>         | 6.03x10 <sup>-36***</sup>   |      |
| AIC                                          | 6706.2                    | 10073.6                    | 8708.5                            | 10437.4                     | 6338.6                            | 3262.9                      |      |
| BIC                                          | 6733.7                    | 10101.1                    | 8745.0                            | 10469.5                     | 6375.2                            | 3299.6                      |      |
| Log Likelihood                               | -3347.1                   | -5030.8                    | -4346.2                           | -5211.7                     | -3161.3                           | -1623.4                     |      |
| Num. obs.                                    | 678                       | 724                        | 716                               | 724                         | 724                               | 724                         |      |
| Num. groups: dcc_project_4                   | 26                        | 26                         | 26                                | 26                          | 26                                | 26                          |      |

\*\*\*p < 0.001; \*\*p < 0.01; \*p < 0.05

# Supplementary Notes

## Supplementary Note 1: List of Mixed Effects Models

The models discussed in the paper are listed below in the lme4 and glmmTMB formula syntax. We have tried to be consistent in how we constructed our models, however, they do differ with regard to the distribution used to model the independent variable, and the structure of the fixed effects (e.g. some models include interaction terms between different fixed effects, whereas others do not). Ultimately, we decided to choose the model that reflected the data in the most appropriate way. The criteria that we used for model selection consisted of choosing the model with the lowest Akaike Information Criterion value, as well as comparing different models using an ANOVA, and selecting the one performed significantly better than the others.

We acknowledge that our models do not paint a complete picture of the cellular processes contributing to genomic instability, but they do provide a valuable insight into the effects of APOBEC on genomic instability and mutation burden.

### Models of Mutation Burden

$$\begin{aligned} \log(\text{non-SBS2/SBS13}) &\sim \text{Age} + (1|\text{Tumour Type}) \\ \text{Model family: Linear Mixed Effects Model} & \\ \text{R package: lme4} & \end{aligned} \tag{1}$$

$$\begin{aligned} \log(\text{non-SBS2/SBS13}) &\sim \log(\text{SBS2/SBS13}) + (1|\text{Tumour Type}) \\ \text{Model family: Linear Mixed Effects Model} & \\ \text{R package: lme4} & \end{aligned} \tag{2}$$

$$\begin{aligned} \log(\text{non-SBS2/SBS13}) &\sim \text{Age} + \log(\text{SBS2/SBS13}) + (1|\text{Tumour Type}) \\ \text{Model family: Linear Mixed Effects Model} & \\ \text{R package: lme4} & \end{aligned} \tag{3}$$

### Models of Genomic Instability

$$\begin{aligned} \text{PGA} &\sim \text{Age} + \log(\text{SBS2/SBS13}) + (1|\text{Tumour Type}) \\ \text{Model family: Linear Mixed Effects Model} & \\ \text{R package: lme4} & \end{aligned} \tag{4}$$

$$\begin{aligned} \text{CN Segments} &\sim \text{Age} + \log(\text{SBS2/SBS13}) + (1|\text{Tumour Type}) \\ \text{Model family: Negative Binomial Mixed Effects Model} & \\ \text{R package: glmmTMB} & \end{aligned} \tag{5}$$

$$\begin{aligned} \text{SVs} &\sim \text{Age} + \log(\text{SBS2/SBS13}) + \text{Age} \times \log(\text{SBS2/SBS13}) + (1|\text{Tumour Type}) \\ \text{Model family: Negative Binomial Mixed Effects Model} & \\ \text{R package: glmmTMB} & \end{aligned} \tag{6}$$

$$\begin{aligned} \text{INDELS} &\sim \text{Age} + \log(\text{SBS2/SBS13}) + \text{Age} \times \log(\text{SBS2/SBS13}) + (1|\text{Tumour Type}) \\ \text{Model family: Negative Binomial Mixed Effects Model} & \\ \text{R package: glmmTMB} & \end{aligned} \tag{7}$$

$$\begin{aligned} \text{ID8} &\sim \text{Age} + \log(\text{SBS2/SBS13}) + \text{Age} \times \log(\text{SBS2/SBS13}) + (1|\text{Tumour Type}) \\ \text{Model family: Zero Inflated Negative Binomial Mixed Effects Model} & \\ \text{R package: glmmTMB} & \end{aligned} \tag{8}$$

$$\begin{aligned} \text{ID6} &\sim \text{Age} + \log(\text{SBS2/SBS13}) + \text{Age} \times \log(\text{SBS2/SBS13}) + (1|\text{Tumour Type}) \\ \text{Model family: Zero Inflated Negative Binomial Mixed Effects Model} & \\ \text{R package: glmmTMB} & \end{aligned} \tag{9}$$

## Models of Genomic Instability including TP53 Mutation Status

$$\begin{aligned} \text{PGA} &\sim \text{Age} + \log(\text{SBS2}/\text{SBS13}) + \text{TP53} + (1|\text{Tumour Type}) \\ \text{Model family: Linear Mixed Effects Model} & \\ \text{R package: lme4} & \end{aligned} \quad (10)$$

$$\begin{aligned} \text{CN Segments} &\sim \text{Age} + \log(\text{SBS2}/\text{SBS13}) + \text{TP53} + (1|\text{Tumour Type}) \\ \text{Model family: Negative Binomial Mixed Effects Model} & \\ \text{R package: glmmTMB} & \end{aligned} \quad (11)$$

$$\begin{aligned} \text{SVs} &\sim \text{Age} + \log(\text{SBS2}/\text{SBS13}) + \text{TP53} + \text{Age} \times \log(\text{SBS2}/\text{SBS13}) + \log(\text{SBS2}/\text{SBS13}) \times \text{TP53} + (1|\text{Tumour Type}) \\ \text{Model family: Negative Binomial Mixed Effects Model} & \\ \text{R package: glmmTMB} & \end{aligned} \quad (12)$$

$$\begin{aligned} \text{INDELS} &\sim \text{Age} + \log(\text{SBS2}/\text{SBS13}) + \text{TP53} + \log(\text{SBS2}/\text{SBS13}) \times \text{TP53} + (1|\text{Tumour Type}) \\ \text{Model family: Negative Binomial Mixed Effects Model} & \\ \text{R package: glmmTMB} & \end{aligned} \quad (13)$$

$$\begin{aligned} \text{ID8} &\sim \text{Age} + \log(\text{SBS2}/\text{SBS13}) + \text{Age} \times \log(\text{SBS2}/\text{SBS13}) + \text{TP53} + (1|\text{Tumour Type}) \\ \text{Model family: Zero Inflated Negative Binomial Mixed Effects Model} & \\ \text{R package: glmmTMB} & \end{aligned} \quad (14)$$

$$\begin{aligned} \text{ID6} &\sim \text{Age} + \log(\text{SBS2}/\text{SBS13}) + \text{TP53} + \log(\text{SBS2}/\text{SBS13}) \times \text{TP53} + (1|\text{Tumour Type}) \\ \text{Model family: Zero Inflated Negative Binomial Mixed Effects Model} & \\ \text{R package: glmmTMB} & \end{aligned} \quad (15)$$

## CoxME Models

The function fitted by the CoxME package is summarised in [1] as:

$$\begin{aligned} \lambda(t) &= \lambda_0(t)e^{X\beta + Zb} \\ b &\sim G(0, \Sigma(\theta)) \end{aligned}$$

Here,  $t$  represents time,  $X$  represents the design matrix for fixed effects, and  $Z$  represents the design matrix for the random effects.  $\lambda(t)$  represents the function that is being fit and  $\lambda_0(t)$  represents a baseline hazard function.  $\beta$  represents a vector of coefficients for the fixed effects, and  $b$  represents a vector of coefficients for the random effects.  $G$  refers to the Gaussian distribution.

$$\text{Survival}(\text{Survival Time, Censoring Status}) \sim \text{SBS2}/\text{SBS13 Presence} + (1|\text{Tumour Type}) \quad (16a)$$

$$\begin{aligned} \text{Hazard}(t) &= \text{Baseline Hazard Function}(t) \cdot e^{X \cdot \text{SBS} + Z \cdot \text{TT}} \\ \text{TT} &\sim G(0, \Sigma(\theta)) \end{aligned} \quad (16b)$$

$$\text{Survival}(\text{Survival Time, Censoring Status}) \sim \text{SBS2}/\text{SBS13 Presence} \times \text{TP53 Mutation} + (1|\text{Tumour Type}) \quad (17a)$$

$$\begin{aligned} \text{Hazard}(t) &= \text{Baseline Hazard Function}(t) \cdot e^{X \cdot (\text{SBS and TP53}) + Z \cdot \text{TT}} \\ \text{TT} &\sim G(0, \Sigma(\theta)) \end{aligned} \quad (17b)$$

## Supplementary Note 2: Fisher p-value combinations

For the comparison of the effect of APOBEC mutation presence or absence on genomic instability within tumour types, our hypothesis for all of the comparisons is the same, that the presence of SBS2 and SBS13 mutations results in increased genomic instability. For this reason, we used Fisher's combined probability test, to combine the p-values for each hypothesis test within individual tumour types [2].

## References

- [1] Therneau, T.M.: Package 'coxme' (2020). <https://cran.hafro.is/web/packages/coxme/coxme.pdf>  
Accessed 7 Apr 2022
- [2] Fisher, R.A.: Statistical Methods for Research Workers. Oliver and Boyd, Edinburgh (1970)
